# Supplementary material for: Comparative interactomics analysis reveals potential regulators of α6β4 distribution in keratinocytes
Source: PubMed Central journal article supplement (PMC7438003; doi:10.1242/bio.054155), 2020-08-13
Supplement: biolopen-9-054155-s1.pdf [file biolopen-9-054155-s1.pdf]

**Table S1  $\beta$ 4-BirA\* minus versus plus biotin (n=3)**

| Hit nr. | gene_name       | -Log Student's T-test p-value | Student's T-test Difference | Significant or Not Significant |
|---------|-----------------|-------------------------------|-----------------------------|--------------------------------|
| 1       | <b>C6orf132</b> | 4,983474                      | 5,829441                    | Significant                    |
| 2       | <b>STRAP</b>    | 5,358323                      | 5,439143                    | Significant                    |
| 3       | <b>DVL3</b>     | 4,667804                      | 4,740303                    | Significant                    |
| 4       | <b>PHLDB2</b>   | 2,767684                      | 6,536439                    | Significant                    |
| 5       | <b>KANK2</b>    | 2,87541                       | 5,658972                    | Significant                    |
| 6       | <b>TJP1</b>     | 2,212647                      | 6,15713                     | Significant                    |
| 7       | <b>PRAG1</b>    | 2,468922                      | 5,618502                    | Significant                    |
| 8       | <b>ERBIN</b>    | 2,658173                      | 5,390096                    | Significant                    |
| 9       | <b>PHLDB1</b>   | 2,960457                      | 4,994458                    | Significant                    |
| 10      | <b>DLG5</b>     | 2,553412                      | 4,98373                     | Significant                    |
| 11      | <b>KANK1</b>    | 2,843031                      | 4,506907                    | Significant                    |
| 12      | <b>TMEM209</b>  | 3,98492                       | 3,294238                    | Significant                    |
| 13      | <b>SARG</b>     | 2,307854                      | 4,831307                    | Significant                    |
| 14      | <b>RASAL2</b>   | 3,131187                      | 3,974478                    | Significant                    |
| 15      | <b>TANC1</b>    | 1,745995                      | 5,081182                    | Significant                    |
| 16      | <b>NUMB</b>     | 1,739105                      | 4,998629                    | Significant                    |
| 17      | <b>ARHGAP32</b> | 1,588253                      | 5,083693                    | Significant                    |
| 18      | <b>CASKIN2</b>  | 2,656641                      | 3,954532                    | Significant                    |
| 19      | <b>AFDN</b>     | 2,627567                      | 3,92501                     | Significant                    |
| 20      | <b>PPFIBP1</b>  | 2,574133                      | 3,954645                    | Significant                    |
| 21      | <b>HCFC1</b>    | 3,443631                      | 3,035116                    | Significant                    |
| 22      | <b>ZDHHC5</b>   | 2,078496                      | 4,391307                    | Significant                    |
| 23      | <b>ITGB4</b>    | 2,750032                      | 3,707239                    | Significant                    |
| 24      | <b>CKAP5</b>    | 2,024366                      | 4,387561                    | Significant                    |
| 25      | <b>KIAA1217</b> | 2,076192                      | 4,219676                    | Significant                    |
| 26      | <b>SEPTIN10</b> | 3,578716                      | 2,683586                    | Significant                    |
| 27      | <b>DLG1</b>     | 2,375055                      | 3,864595                    | Significant                    |
| 28      | <b>TNS3</b>     | 2,848121                      | 3,311089                    | Significant                    |
| 29      | <b>PHACTR4</b>  | 2,683133                      | 3,387091                    | Significant                    |
| 30      | <b>XRN1</b>     | 1,963038                      | 4,076722                    | Significant                    |
| 31      | <b>DST</b>      | 3,602855                      | 2,43597                     | Significant                    |
| 32      | <b>PXN</b>      | 2,098293                      | 3,880695                    | Significant                    |
| 33      | <b>ALMS1</b>    | 3,078797                      | 2,887848                    | Significant                    |
| 34      | <b>EGFR</b>     | 2,443831                      | 3,518398                    | Significant                    |
| 35      | <b>TJP2</b>     | 2,417764                      | 3,532287                    | Significant                    |
| 36      | <b>EPHA2</b>    | 2,516803                      | 3,399036                    | Significant                    |
| 37      | <b>CDKAL1</b>   | 2,254826                      | 3,602667                    | Significant                    |
| 38      | <b>USP15</b>    | 2,182815                      | 3,664659                    | Significant                    |
| 39      | <b>ITGA6</b>    | 2,432058                      | 3,38373                     | Significant                    |
| 40      | <b>EPB41</b>    | 1,6449                        | 4,044989                    | Significant                    |
| 41      | <b>BCAR3</b>    | 1,683942                      | 3,984955                    | Significant                    |
| 42      | <b>COL17A1</b>  | 2,650895                      | 3,010379                    | Significant                    |
| 43      | <b>SYNJ1</b>    | 2,650471                      | 2,985749                    | Significant                    |
| 44      | <b>KEAP1</b>    | 2,736491                      | 2,898935                    | Significant                    |

|    |                  |          |          |             |
|----|------------------|----------|----------|-------------|
| 45 | <b>DBNL</b>      | 3,173068 | 2,459415 | Significant |
| 46 | <b>MRE11</b>     | 2,61295  | 2,893466 | Significant |
| 47 | <b>CAMSAP1</b>   | 2,545257 | 2,866247 | Significant |
| 48 | <b>ZYX</b>       | 1,62286  | 3,758633 | Significant |
| 49 | <b>STAT3</b>     | 2,489712 | 2,887028 | Significant |
| 50 | <b>OSBPL10</b>   | 3,70151  | 1,671032 | Significant |
| 51 | <b>ANKRD50</b>   | 2,270448 | 3,08513  | Significant |
| 52 | <b>PDLIM5</b>    | 1,46882  | 3,875849 | Significant |
| 53 | <b>OSBPL3</b>    | 1,946815 | 3,373469 | Significant |
| 54 | <b>CTNNB1</b>    | 2,339995 | 2,9701   | Significant |
| 55 | <b>DSG2</b>      | 2,689629 | 2,615779 | Significant |
| 56 | <b>AFAP1L2</b>   | 2,344092 | 2,934981 | Significant |
| 57 | <b>TOR1AIP1</b>  | 2,194225 | 3,076172 | Significant |
| 58 | <b>P4HB</b>      | 2,929372 | 2,314976 | Significant |
| 59 | <b>KNL1</b>      | 2,270656 | 2,957877 | Significant |
| 60 | <b>MARK2</b>     | 1,536176 | 3,664413 | Significant |
| 61 | <b>PEAK1</b>     | 1,933287 | 3,252141 | Significant |
| 62 | <b>PAK6</b>      | 2,944358 | 2,226367 | Significant |
| 63 | <b>PLEKHA5</b>   | 2,214435 | 2,943157 | Significant |
| 64 | <b>STX5</b>      | 2,172632 | 2,959009 | Significant |
| 65 | <b>FAM83B</b>    | 1,816628 | 3,305831 | Significant |
| 66 | <b>EIF4G1</b>    | 1,485525 | 3,621386 | Significant |
| 67 | <b>FAM135A</b>   | 1,375172 | 3,718792 | Significant |
| 68 | <b>CTNNA1</b>    | 1,580063 | 3,480512 | Significant |
| 69 | <b>SEPTIN7</b>   | 2,806311 | 2,132664 | Significant |
| 70 | <b>MRTFB</b>     | 2,327732 | 2,584309 | Significant |
| 71 | <b>GOLGA5</b>    | 1,738443 | 3,137636 | Significant |
| 72 | <b>CEP170</b>    | 2,407126 | 2,445349 | Significant |
| 73 | <b>SEC23B</b>    | 2,780671 | 2,039096 | Significant |
| 74 | <b>CTNND1</b>    | 1,573463 | 3,240248 | Significant |
| 75 | <b>TLN1</b>      | 2,453104 | 2,347322 | Significant |
| 76 | <b>LIMD1</b>     | 2,297273 | 2,497599 | Significant |
| 77 | <b>TACC1</b>     | 1,881098 | 2,883171 | Significant |
| 78 | <b>EPS15</b>     | 1,453904 | 3,303209 | Significant |
| 79 | <b>TNKS1BP1</b>  | 2,397446 | 2,351044 | Significant |
| 80 | <b>TRIP6</b>     | 2,11035  | 2,607492 | Significant |
| 81 | <b>KIAA1522</b>  | 1,503754 | 3,17632  | Significant |
| 82 | <b>KIDINS220</b> | 1,578511 | 3,100849 | Significant |
| 83 | <b>BAIAP2</b>    | 1,844836 | 2,79409  | Significant |
| 84 | <b>NUMBL</b>     | 1,468244 | 3,166171 | Significant |
| 85 | <b>SCRIB</b>     | 1,304554 | 3,27726  | Significant |
| 86 | <b>SEPTIN2</b>   | 2,879636 | 1,640544 | Significant |
| 87 | <b>PTPN13</b>    | 1,36217  | 3,092864 | Significant |
| 88 | <b>ZC3HAV1</b>   | 2,580625 | 1,846071 | Significant |
| 89 | <b>SNTB2</b>     | 1,740071 | 2,672489 | Significant |
| 90 | <b>DPYSL2</b>    | 1,506151 | 2,894411 | Significant |
| 91 | <b>CRYBG1</b>    | 2,342753 | 2,056397 | Significant |
| 92 | <b>EPS15L1</b>   | 1,8667   | 2,465309 | Significant |

|     |                   |          |          |             |
|-----|-------------------|----------|----------|-------------|
| 93  | <b>CNOT1</b>      | 1,326709 | 2,93485  | Significant |
| 94  | <b>UTRN</b>       | 1,366115 | 2,877391 | Significant |
| 95  | <b>STON2</b>      | 1,49409  | 2,704155 | Significant |
| 96  | <b>MYOF</b>       | 1,481122 | 2,710726 | Significant |
| 97  | <b>PLEKHA1</b>    | 1,576795 | 2,594016 | Significant |
| 98  | <b>RPS5</b>       | 1,786686 | 2,372269 | Significant |
| 99  | <b>PPP2R3A</b>    | 1,35673  | 2,784499 | Significant |
| 100 | <b>CLMN</b>       | 1,913424 | 2,200071 | Significant |
| 101 | <b>CPSF3</b>      | 1,450164 | 2,658859 | Significant |
| 102 | <b>PAK2; PAK3</b> | 1,332827 | 2,773766 | Significant |
| 103 | <b>SLK</b>        | 2,140135 | 1,964647 | Significant |
| 104 | <b>CTTN</b>       | 1,596139 | 2,499079 | Significant |
| 105 | <b>TBC1D2</b>     | 1,430951 | 2,650555 | Significant |
|     | <b>DVL1;</b>      |          |          |             |
| 106 | <b>DVL1P1</b>     | 1,45026  | 2,621412 | Significant |
| 107 | <b>VANGL1</b>     | 1,911336 | 2,158401 | Significant |
| 108 | <b>HAUS6</b>      | 1,482955 | 2,578769 | Significant |
| 109 | <b>TNS4</b>       | 1,969631 | 2,081828 | Significant |
| 110 | <b>PARVA</b>      | 1,589847 | 2,45697  | Significant |
| 111 | <b>FASN</b>       | 2,194431 | 1,834911 | Significant |
| 112 | <b>SEPTIN9</b>    | 1,65478  | 2,33521  | Significant |
| 113 | <b>ERC1</b>       | 1,48826  | 2,450827 | Significant |
| 114 | <b>TRIM29</b>     | 1,948189 | 1,97771  | Significant |
| 115 | <b>HLC5</b>       | 1,831847 | 2,077721 | Significant |
| 116 | <b>WDR44</b>      | 2,033889 | 1,81997  | Significant |
| 117 | <b>ARHGAP1</b>    | 2,054083 | 1,798428 | Significant |
| 118 | <b>HSPA5</b>      | 1,941704 | 1,891386 | Significant |
| 119 | <b>GSDME</b>      | 1,477945 | 2,314721 | Significant |
| 120 | <b>PPP1R13L</b>   | 1,850449 | 1,931557 | Significant |
| 121 | <b>NDC1</b>       | 1,308662 | 2,438623 | Significant |
| 122 | <b>EIF5</b>       | 1,369071 | 2,313273 | Significant |
| 123 | <b>SRP68</b>      | 1,471446 | 2,094981 | Significant |
| 124 | <b>PREB</b>       | 1,521998 | 1,975349 | Significant |
| 125 | <b>GIGYF2</b>     | 1,323151 | 2,128295 | Significant |
| 126 | <b>NCKAP1</b>     | 1,880176 | 1,507039 | Significant |
| 127 | <b>TOR1AIP2</b>   | 1,441381 | 1,905609 | Significant |
| 128 | <b>MIA3</b>       | 1,396912 | 1,868633 | Significant |
| 129 | <b>CORO1B</b>     | 1,691772 | 1,521893 | Significant |
| 130 | <b>MYO1B</b>      | 1,421529 | 1,647255 | Significant |

**Table S2  $\beta$ 4-BirA\* plus biotin versus IL2R-BirA\* plus biotin (n=3)**

| Hit nr. | gene_name | -Log Student's T-test p-value | Student's T-test Difference | Significant or Not Significant |
|---------|-----------|-------------------------------|-----------------------------|--------------------------------|
| 1       | ERC1      | 3,481444857                   | 8,505638123                 | Significant                    |
| 2       | TLN1      | 3,581817628                   | 7,120169322                 | Significant                    |
| 3       | ITGB4     | 4,544548974                   | 6,099866867                 | Significant                    |
| 4       | PHLDB2    | 2,983890001                   | 6,950602849                 | Significant                    |
| 5       | DLG5      | 3,342639935                   | 6,558958054                 | Significant                    |
| 6       | KANK2     | 3,480366787                   | 6,220681508                 | Significant                    |
| 7       | UTRN      | 2,847510042                   | 6,780156453                 | Significant                    |
| 8       | ERBIN     | 4,176936312                   | 5,378283183                 | Significant                    |
| 9       | TNS3      | 2,98877645                    | 6,512499491                 | Significant                    |
| 10      | FLNA      | 3,692615081                   | 5,793609619                 | Significant                    |
| 11      | C6orf132  | 3,636677727                   | 5,681793213                 | Significant                    |
| 12      | MRTFB     | 3,459058067                   | 5,470768611                 | Significant                    |
| 13      | PPFIBP1   | 3,049205187                   | 5,679796219                 | Significant                    |
| 14      | PHLDB1    | 3,317555626                   | 5,358519872                 | Significant                    |
| 15      | PXN       | 2,984780434                   | 5,661593755                 | Significant                    |
| 16      | AFDN      | 3,202498378                   | 5,354756037                 | Significant                    |
| 17      | CASKIN2   | 2,579636516                   | 5,91941007                  | Significant                    |
| 18      | ITGA6     | 3,69593834                    | 4,710760752                 | Significant                    |
| 19      | FAM135A   | 3,076519622                   | 5,296726227                 | Significant                    |
| 20      | SNTB2     | 3,875892229                   | 4,392897288                 | Significant                    |
| 21      | HCFC1     | 3,665954974                   | 4,557535807                 | Significant                    |
| 22      | RANBP2    | 3,45937565                    | 4,640565236                 | Significant                    |
| 23      | EPS15     | 3,506200691                   | 4,381397247                 | Significant                    |
| 24      | AHNAK2    | 3,888924626                   | 3,950870514                 | Significant                    |
| 25      | RASAL2    | 3,289661917                   | 4,471676509                 | Significant                    |
| 26      | CTTN      | 3,303366787                   | 4,451934179                 | Significant                    |
| 27      | TJP1      | 1,966626185                   | 5,741708755                 | Significant                    |
| 28      | EPS15L1   | 2,445331222                   | 5,140254339                 | Significant                    |
| 29      | LIMD1     | 2,777955382                   | 4,573886871                 | Significant                    |
| 30      | SARG      | 2,696310705                   | 4,625443776                 | Significant                    |
| 31      | FASN      | 3,384033954                   | 3,843261083                 | Significant                    |
| 32      | PRAG1     | 2,241282967                   | 4,90564092                  | Significant                    |
| 33      | COPG2     | 2,378271653                   | 4,754276276                 | Significant                    |
| 34      | KEAP1     | 3,415543592                   | 3,704780579                 | Significant                    |
| 35      | KNL1      | 2,834111549                   | 4,157740911                 | Significant                    |
| 36      | PAICS     | 2,238095701                   | 4,705089569                 | Significant                    |
| 37      | DST       | 3,219950901                   | 3,594175339                 | Significant                    |
| 38      | HAUS6     | 2,631781868                   | 4,105353038                 | Significant                    |
| 39      | KIAA1217  | 2,182224653                   | 4,530141195                 | Significant                    |
| 40      | TANC1     | 1,736521966                   | 4,944445928                 | Significant                    |
| 41      | CORO1B    | 2,068802921                   | 4,605710347                 | Significant                    |
| 42      | VCL       | 2,352787637                   | 4,258904775                 | Significant                    |
| 43      | TJP2      | 2,069333299                   | 4,457257589                 | Significant                    |
| 44      | COL17A1   | 3,675474167                   | 2,851025263                 | Significant                    |

|    |                     |             |             |             |
|----|---------------------|-------------|-------------|-------------|
| 45 | <b>ZYX</b>          | 3,356762107 | 3,152051926 | Significant |
| 46 | <b>KANK1</b>        | 2,690169364 | 3,815174103 | Significant |
| 47 | <b>DLG1</b>         | 3,046704133 | 3,391640981 | Significant |
| 48 | <b>DVL3</b>         | 2,648674334 | 3,73213768  | Significant |
| 49 | <b>MRE11</b>        | 3,082871523 | 3,254869461 | Significant |
| 50 | <b>PDLIM5</b>       | 2,817555645 | 3,458613078 | Significant |
| 51 | <b>CCT8</b>         | 3,703036455 | 2,57158788  | Significant |
| 52 | <b>ZDHHC5</b>       | 2,727467918 | 3,505296707 | Significant |
| 53 | <b>SYNJ1</b>        | 2,835113525 | 3,36527888  | Significant |
| 54 | <b>FLNB</b>         | 2,547081332 | 3,589440028 | Significant |
| 55 | <b>GIGYF2</b>       | 1,935724205 | 4,193858465 | Significant |
| 56 | <b>NUMB</b>         | 2,075414634 | 4,018562317 | Significant |
| 57 | <b>CD2AP</b>        | 1,98686568  | 4,100517273 | Significant |
| 58 | <b>TNKS1BP1</b>     | 3,694091508 | 2,382957458 | Significant |
| 59 | <b>CAMSAP1</b>      | 3,217282284 | 2,838649114 | Significant |
| 60 | <b>RAI14</b>        | 3,354103418 | 2,691554387 | Significant |
| 61 | <b>XRN1</b>         | 2,190858906 | 3,76820755  | Significant |
| 62 | <b>EPB41</b>        | 1,803677296 | 4,113066991 | Significant |
| 63 | <b>PPP1R13L</b>     | 3,063666472 | 2,851318359 | Significant |
| 64 | <b>BCAR3</b>        | 2,380913043 | 3,505453746 | Significant |
| 65 | <b>CRK</b>          | 1,882988449 | 3,882542292 | Significant |
| 66 | <b>PPFIA1</b>       | 1,996505563 | 3,761895498 | Significant |
| 67 | <b>STON2</b>        | 2,173356114 | 3,577549616 | Significant |
| 68 | <b>GEMIN5</b>       | 2,404223592 | 3,230573654 | Significant |
|    | <b>SUMO1;</b>       |             |             |             |
| 69 | <b>SUMO1P1</b>      | 2,386578667 | 3,24376742  | Significant |
| 70 | <b>PLEKHA5</b>      | 2,446916112 | 3,096908569 | Significant |
| 71 | <b>ARHGAP32</b>     | 1,561314621 | 3,890457153 | Significant |
| 72 | <b>NIBAN2</b>       | 2,13109677  | 3,285207113 | Significant |
| 73 | <b>NUP155</b>       | 1,73024664  | 3,636830012 | Significant |
| 74 | <b>NUMBL</b>        | 2,353817544 | 2,903125763 | Significant |
| 75 | <b>FLNC</b>         | 2,44701986  | 2,788606008 | Significant |
| 76 | <b>PGAM5</b>        | 1,592931241 | 3,64104716  | Significant |
| 77 | <b>PEAK1</b>        | 2,043743571 | 3,09951973  | Significant |
| 78 | <b>GSDME</b>        | 2,469893718 | 2,571150462 | Significant |
| 79 | <b>EZR</b>          | 2,494924515 | 2,540669759 | Significant |
| 80 | <b>PLEC</b>         | 2,332927231 | 2,695134481 | Significant |
| 81 | <b>SEPTIN11</b>     | 1,434980548 | 3,572987874 | Significant |
| 82 | <b>EIF4G1</b>       | 1,704669512 | 3,302465439 | Significant |
| 83 | <b>TNS4</b>         | 2,125851587 | 2,849858602 | Significant |
| 84 | <b>DBNL</b>         | 2,517551864 | 2,45506223  | Significant |
| 85 | <b>SEC23B</b>       | 2,674478003 | 2,275936127 | Significant |
| 86 | <b>ANKRD50</b>      | 1,986281071 | 2,940560659 | Significant |
| 87 | <b>NUP133</b>       | 1,86793902  | 3,040430069 | Significant |
| 88 | <b>USP15</b>        | 2,159837345 | 2,73382314  | Significant |
| 89 | <b>DPYSL2</b>       | 1,788395045 | 3,086363475 | Significant |
| 90 | <b>DVL1; DVL1P1</b> | 2,594036395 | 2,095871607 | Significant |
| 91 | <b>RANGAP1</b>      | 2,486894601 | 2,142262141 | Significant |

|      |                  |             |              |             |
|------|------------------|-------------|--------------|-------------|
| 92   | <b>SCRIB</b>     | 1,344199081 | 3,262561162  | Significant |
| 93   | <b>MYOF</b>      | 2,003924906 | 2,574784597  | Significant |
| 94   | <b>AFAP1L2</b>   | 2,008192016 | 2,545626958  | Significant |
| 95   | <b>PHACTR4</b>   | 2,077948368 | 2,438491821  | Significant |
| 96   | <b>CLMN</b>      | 1,786895948 | 2,628778458  | Significant |
| 97   | <b>MYO1B</b>     | 2,009816238 | 2,405704498  | Significant |
| 98   | <b>PTPN12</b>    | 1,770341919 | 2,527658463  | Significant |
| 99   | <b>KIAA1522</b>  | 1,434910617 | 2,782882055  | Significant |
| 100  | <b>TBC1D2</b>    | 1,61659234  | 2,586899439  | Significant |
| 101  | <b>KIDINS220</b> | 1,593514253 | 2,492033005  | Significant |
| 102  | <b>TAB1</b>      | 1,759756465 | 2,261226018  | Significant |
| 103  | <b>LARP1</b>     | 1,735629349 | 2,248367945  | Significant |
| 104  | <b>CNOT1</b>     | 1,804821663 | 2,127309163  | Significant |
| 105  | <b>ALMS1</b>     | 1,89143119  | 2,016126633  | Significant |
| 106  | <b>EFHD2</b>     | 1,530886966 | 2,349688212  | Significant |
| 107  | <b>LAMC2</b>     | 1,77275406  | 2,102012634  | Significant |
| 108  | <b>TRIP6</b>     | 1,752601881 | 2,068318685  | Significant |
| 109  | <b>AHNAK</b>     | 1,796851728 | 2,004161835  | Significant |
| 110  | <b>CKAP5</b>     | 1,695504425 | 2,085919062  | Significant |
| 111  | <b>EIF4E2</b>    | 1,410038458 | 2,31280454   | Significant |
| 112  | <b>LUZP1</b>     | 1,653578751 | 2,033416748  | Significant |
| 113  | <b>STRAP</b>     | 1,351146383 | 2,279120763  | Significant |
| 114  | <b>GAPVD1</b>    | 1,364759025 | 2,098588943  | Significant |
| 115  | <b>SEC24A</b>    | 1,342436151 | 2,096307755  | Significant |
| N.A. | <b>IL2RA</b>     | 3,032817452 | -7,126452764 | Significant |

**Table S3  $\alpha$ 6-BirA\* plus biotin versus IL2R-BirA\* plus biotin (n=3)**

| Hit nr. | gene_name       | -Log Student's T-test p-value | Student's T-test Difference | Significant or Not Significant |
|---------|-----------------|-------------------------------|-----------------------------|--------------------------------|
| 1       | <b>PPFIBP1</b>  | 4,669456                      | 6,347483                    | Significant                    |
| 2       | <b>KRT6B</b>    | 3,111004                      | 7,094639                    | Significant                    |
| 3       | <b>ITGA6</b>    | 4,288527                      | 5,560982                    | Significant                    |
| 4       | <b>ITGB4</b>    | 4,775116                      | 4,975218                    | Significant                    |
| 5       | <b>CCT8</b>     | 3,950828                      | 4,540769                    | Significant                    |
| 6       | <b>CASKIN2</b>  | 2,869794                      | 5,001071                    | Significant                    |
| 7       | <b>PPFIA1</b>   | 3,255039                      | 4,556779                    | Significant                    |
| 8       | <b>GIGYF2</b>   | 2,989378                      | 4,798739                    | Significant                    |
| 9       | <b>CPSF1</b>    | 4,077145                      | 3,630538                    | Significant                    |
| 10      | <b>COL17A1</b>  | 3,806056                      | 3,784993                    | Significant                    |
| 11      | <b>AFDN</b>     | 3,039809                      | 4,351351                    | Significant                    |
| 12      | <b>TLN1</b>     | 2,91994                       | 4,389297                    | Significant                    |
| 13      | <b>FAM135A</b>  | 3,383138                      | 3,919304                    | Significant                    |
| 14      | <b>RANBP2</b>   | 3,08683                       | 3,62579                     | Significant                    |
| 15      | <b>FERMT2</b>   | 2,455125                      | 4,022923                    | Significant                    |
| 16      | <b>ATXN2L</b>   | 2,702989                      | 3,616952                    | Significant                    |
| 17      | <b>UBAP2L</b>   | 2,496555                      | 3,812288                    | Significant                    |
| 18      | <b>PXN</b>      | 2,954383                      | 3,328231                    | Significant                    |
| 19      | <b>TNS3</b>     | 1,745012                      | 4,476346                    | Significant                    |
| 20      | <b>DLG1</b>     | 2,609315                      | 3,538345                    | Significant                    |
| 21      | <b>RASAL2</b>   | 3,083443                      | 2,994352                    | Significant                    |
| 22      | <b>HNRNPK</b>   | 3,915844                      | 2,144055                    | Significant                    |
| 23      | <b>SNTB2</b>    | 2,56236                       | 3,424726                    | Significant                    |
| 24      | <b>MATR3</b>    | 3,634498                      | 2,304412                    | Significant                    |
| 25      | <b>KANK2</b>    | 2,45178                       | 3,45656                     | Significant                    |
| 26      | <b>UBAP2</b>    | 3,573092                      | 2,310243                    | Significant                    |
| 27      | <b>FLNA</b>     | 3,237366                      | 2,54853                     | Significant                    |
| 28      | <b>PHLDB2</b>   | 2,359253                      | 3,390733                    | Significant                    |
| 29      | <b>PEAK1</b>    | 2,468034                      | 3,219858                    | Significant                    |
| 30      | <b>FUS</b>      | 1,374602                      | 4,165538                    | Significant                    |
| 31      | <b>S100A9</b>   | 2,112974                      | 3,355374                    | Significant                    |
| 32      | <b>PHLDB1</b>   | 2,493957                      | 2,838808                    | Significant                    |
| 33      | <b>CPSF7</b>    | 1,840395                      | 3,39662                     | Significant                    |
| 34      | <b>BCL9L</b>    | 2,346201                      | 2,765827                    | Significant                    |
| 35      | <b>RUVBL1</b>   | 2,680651                      | 2,320124                    | Significant                    |
| 36      | <b>PLEC</b>     | 2,225699                      | 2,706984                    | Significant                    |
| 37      | <b>KEAP1</b>    | 2,538155                      | 2,375415                    | Significant                    |
| 38      | <b>CRK</b>      | 1,56615                       | 3,283579                    | Significant                    |
| 39      | <b>IGF2BP2</b>  | 1,631004                      | 3,077057                    | Significant                    |
| 40      | <b>NUMB</b>     | 2,042991                      | 2,58675                     | Significant                    |
| 41      | <b>SERPINB2</b> | 2,569307                      | 2,052409                    | Significant                    |
| 42      | <b>EPS15L1</b>  | 1,835766                      | 2,744539                    | Significant                    |
| 43      | <b>LAMC2</b>    | 1,748527                      | 2,822986                    | Significant                    |
| 44      | <b>RUVBL2</b>   | 2,245734                      | 2,261399                    | Significant                    |

|      |                 |          |          |             |
|------|-----------------|----------|----------|-------------|
| 45   | <b>PPP1R13L</b> | 2,186067 | 2,316207 | Significant |
| 46   | <b>ZDHC5</b>    | 2,065901 | 2,403255 | Significant |
| 47   | <b>ERBIN</b>    | 2,006092 | 2,428099 | Significant |
| 48   | <b>XRN1</b>     | 1,596127 | 2,833532 | Significant |
| 49   | <b>MRTFB</b>    | 1,438106 | 2,841951 | Significant |
| 50   | <b>RBM27</b>    | 1,802634 | 2,413303 | Significant |
|      | <b>DVL1;</b>    |          |          |             |
| 51   | <b>DVL1P1</b>   | 1,981644 | 2,080001 | Significant |
| 52   | <b>FAM83H</b>   | 1,476162 | 2,473873 | Significant |
| 53   | <b>NIBAN2</b>   | 1,802916 | 2,117793 | Significant |
| 54   | <b>DLG5</b>     | 1,642364 | 2,168767 | Significant |
| 55   | <b>FUBP3</b>    | 1,592617 | 2,172834 | Significant |
| 56   | <b>TJP2</b>     | 1,45394  | 2,308683 | Significant |
| 57   | <b>SNX1</b>     | 1,402968 | 2,278321 | Significant |
| N.A. | <b>IL2RA</b>    | 2,721453 | -6,57328 | Significant |
| N.A. | <b>ITGB1</b>    | 2,062781 | -2,60988 | Significant |



**Table S4  $\beta$ 4-BirA\* plus biotin CD151 proficient vs deficient (n=3)**

| Hit nr. | gene_name        | -Log Student's T-test p-value | Student's T-test Difference | Significant or Not Significant |
|---------|------------------|-------------------------------|-----------------------------|--------------------------------|
|         | <b>ACTR1A;</b>   |                               |                             |                                |
| 1       | <b>ACTR1B</b>    | 2,883732626                   | 2,465718587                 | Significant                    |
| 2       | <b>RAB11FIP5</b> | 3,402613417                   | 1,666626612                 | Significant                    |
| 3       | <b>LCN1</b>      | 2,268364451                   | 2,268799464                 | Significant                    |
|         | <b>MYL12A;</b>   |                               |                             |                                |
| 4       | <b>MYL12B</b>    | 1,40990162                    | 2,174990336                 | Significant                    |
| 5       | <b>DPM1</b>      | 1,89853465                    | 1,309476217                 | Significant                    |
| 6       | <b>STON2</b>     | 2,226312941                   | 0,796698252                 | Significant                    |
| 7       | <b>NBAS</b>      | 1,408316234                   | 1,369881312                 | Significant                    |
| 8       | <b>CFL1</b>      | 1,467073348                   | 0,689799627                 | Significant                    |
| 9       | <b>S100A10</b>   | 2,301280868                   | -1,701531092                | Significant                    |
| 10      | <b>AHR</b>       | 4,39578979                    | -4,764198303                | Significant                    |
| 11      | <b>ITGA3</b>     | 2,218476443                   | -2,697850545                | Significant                    |

**Table S5 Identified  $\alpha 6\beta 4$  interactome in keratinocytes versus  $h\beta 4$ -BirA interactors in MDCK cells\***

| <b><math>\alpha 6\beta 4</math> interactors in keratinocytes</b> | <b>Common</b> | <b><math>\beta 4</math> interactors in MDCK cells</b> |
|------------------------------------------------------------------|---------------|-------------------------------------------------------|
| AFAP1L2                                                          | AHNAK         | 37500                                                 |
| AFDN                                                             | AHNAK2        | ACSL3                                                 |
| ALMS1                                                            | CCT8          | ALDH3A2                                               |
| ANKRD50                                                          | CD2AP         | ANKLE2                                                |
| ARHGAP32                                                         | COL17A1       | ARHGEF12                                              |
| ATXN2L                                                           | COPG2         | C2CD2                                                 |
| BCAR3                                                            | CORO1B        | CAPZB                                                 |
| BCL9L                                                            | CRK           | CCT2                                                  |
| C6orf132                                                         | CTTN          | CCT3                                                  |
| CAMSAP1                                                          | EIF4G1        | CCT4                                                  |
| CASKIN2                                                          | ERC1          | CCT6A                                                 |
| CKAP5                                                            | HCFC1         | CCT7                                                  |
| CLMN                                                             | ITGA6         | CKAP4                                                 |
| CNOT1                                                            | ITGB4         | CLCC1                                                 |
| CPSF1                                                            | KIAA1217      | COPG1                                                 |
| CPSF7                                                            | NUP133        | CSDE1                                                 |
| DBNL                                                             | PDLIM5        | DSG2                                                  |
| DLG1                                                             | PHLDB1        | EIF2AK3                                               |
| DLG5                                                             | PHLDB2        | EIF5                                                  |
| DPYSL2                                                           | RANBP2        | EMC1                                                  |
| DST                                                              | RANGAP1       | EMD                                                   |
| DVL1; DVL1P1                                                     | RUVBL1        | EML4                                                  |
| DVL3                                                             | RUVBL2        | ESYT1                                                 |
| EFHD2                                                            | SEC23B        | EVPL                                                  |
| EIF4E2                                                           | STRAP         | FAM91A1                                               |
| EPB41                                                            | TJP1          | GRAMD3                                                |
| EPS15                                                            | TJP2          | INF2                                                  |
| EPS15L1                                                          | TNKS1BP1      | JUP                                                   |
| ERBIN                                                            | TNS3          | KPNB1                                                 |
| EZR                                                              | UTRN          | KTN1                                                  |
| FAM135A                                                          |               | LBR                                                   |
| FAM83H                                                           |               | LRBA                                                  |
| FASN                                                             |               | MIA3                                                  |
| FERMT2                                                           |               | MOSPD2                                                |
| FLNA                                                             |               | NAP1L4                                                |
| FLNB                                                             |               | NUP214                                                |
| FLNC                                                             |               | NUP62                                                 |
| FUBP3                                                            |               | OSBPL11                                               |
| FUS                                                              |               | PDAP1                                                 |
| GAPVD1                                                           |               | PDZD8                                                 |

GEMIN5  
GIGYF2  
GSDME  
HAUS6  
HNRNPK  
IGF2BP2  
KANK1  
KANK2  
KEAP1  
KIAA1522  
KIDINS220  
KNL1  
KRT6B  
LAMC2  
LARP1  
LIMD1  
LUZP1  
MATR3  
MRE11  
MRTFB  
MYO1B  
MYOF  
NIBAN2  
NUMB  
NUMBL  
NUP155  
PAICS  
PEAK1  
PGAM5  
PHACTR4  
PLEC  
PLEKHA5  
PPFIA1  
PPFIBP1  
PPP1R13L  
PRAG1  
PTPN12  
PXN  
RAI14  
RASAL2  
RBM27  
S100A9  
SARG  
SCRIB  
SEC24A  
SEPTIN11

PPL  
RANBP3  
RDX  
RRBP1  
SEC13  
SEC16A  
SEC24B  
SgK223  
SHROOM2  
SRPR  
SSFA2  
STIM1  
TACC1  
TCP1  
TMPO  
TOR1AIP1  
UBXN4  
VAPA  
VAPB  
VCPIP1  
WDR11

SERPINB2  
SNTB2  
SNX1  
STON2  
SUMO1; SUMO1P1  
SYNJ1  
TAB1  
TANC1  
TBC1D2  
TLN1  
TNS4  
TRIP6  
UBAP2  
UBAP2L  
USP15  
VCL  
XRN1  
ZDHC5  
ZYG

**\*Myllymäki et al. MCP 2019; Table S1; Proteins that were more than 3-fold enriched in h $\beta$ 4-BirA samples relative to the BirA-negative control**
